# Supplementary material
Source: PubMed Central journal article supplement (PMC5196881)
Supplement: thnov07p0009s1.pdf [file thnov07p0009s1.pdf]

## Supporting Information

# Antitumor therapeutic application of self-assembled RNAi-AuNP nanoconstructs; Combination of VEGF-RNAi and photothermal ablation

By

Sejin Son et al.

### Contents of Supporting Information

**Fig. S1.** Optimization of PEI/RNAi-AuNP formulation parameters in terms of hydrodynamic size (a) and UV-VIS absorption spectrum (b) with varying N/P ratios.

**Fig. S2.** TEM images of various geometries of RNAi-AuNPs with PEI complexation. Spherical RNA-AuNP with PEI (a, b, d), ring-like RNAi-AuNP (c,e) and dumbbell-like RNAi-AuNP (f).

**Fig. S3.** UV-VIS spectrum of various geometries of RNAi-AuNPs with PEI polymer.

**Fig. S4.** Dark field images of PC cells with bioreducible PEI/RNAi-AuNPs (a,b) and non-reducible PEI/RNAi-AuNPs (c,d) at N/P ratio of 30 after 6 h incubation.

**Fig. S5.** Time dependent VEGF gene silencing efficacy of monomeric and dimeric siVEGF with PEI formulations. All formulations were formed at N/P ration of 30.

**Fig. S6.** In vitro siVEGF gene silencing efficacy by measuring VEGF protein level (left) and western blotting analysis (right) after 48 h transfection with varying formulations in comparison with scrambled siRNA-AuNP.

**Fig. S7.** Histological examination (H&E staining) of therapeutic efficacy by anti-VEGF and photothermal combination therapy. Yellow arrows are indicative of blood vessels in tumor tissue.

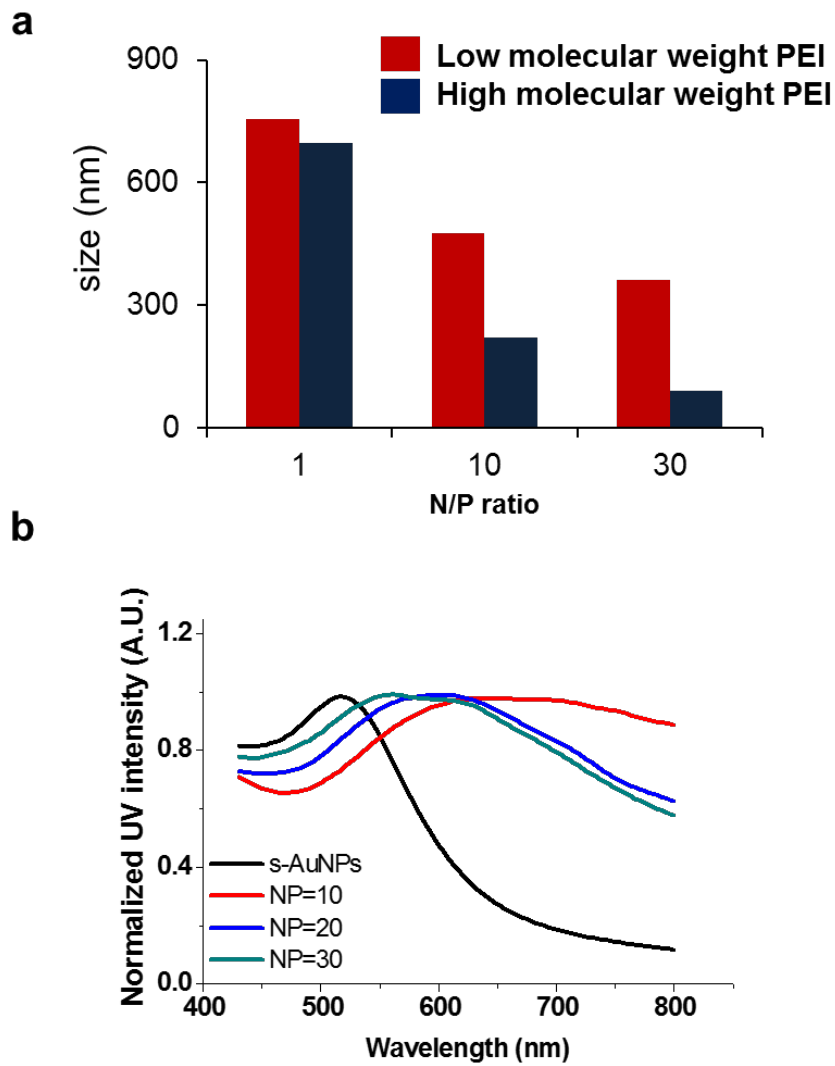

**Fig S1.** Optimization of PEI/RNAi-AuNP formulation parameters in terms of hydrodynamic size (a) and UV-VIS absorption spectrum (b) with varying N/P ratios

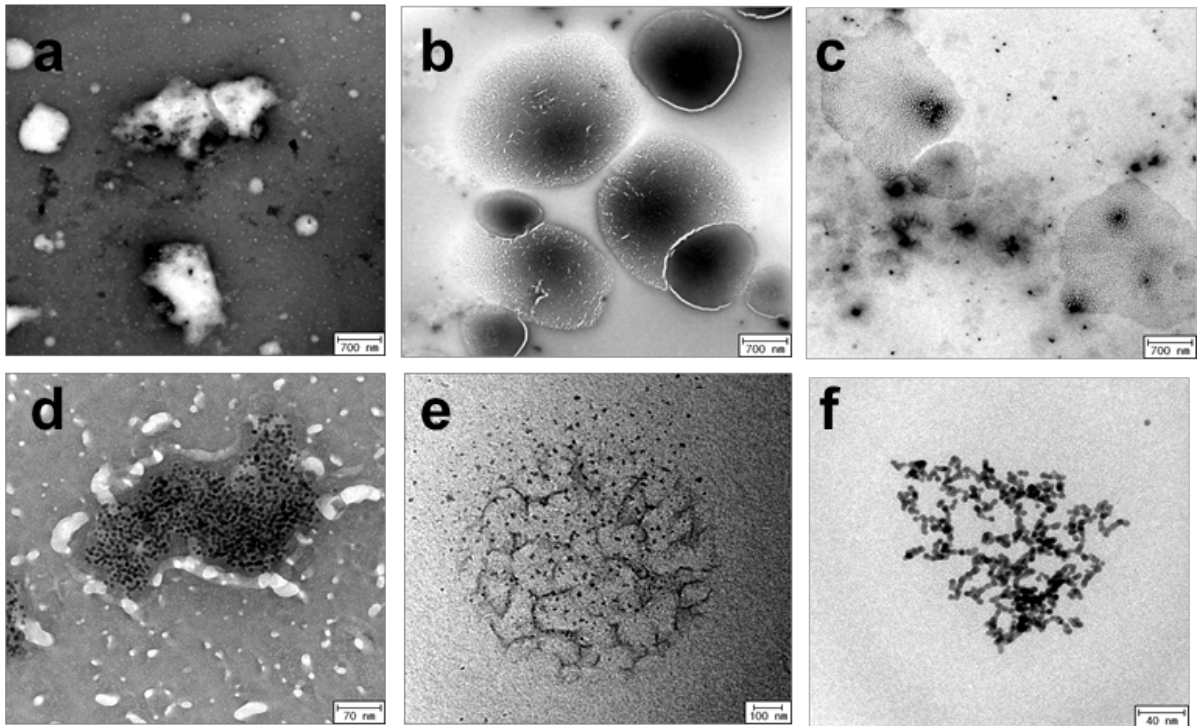

**Fig. S2.** TEM images of various geometries of RNAi-AuNPs with PEI complexation. Spherical RNA-AuNP with PEI (a, b, d), ring-like RNAi-AuNP (c,e) and dumbbell-like RNAi-AuNP (f).

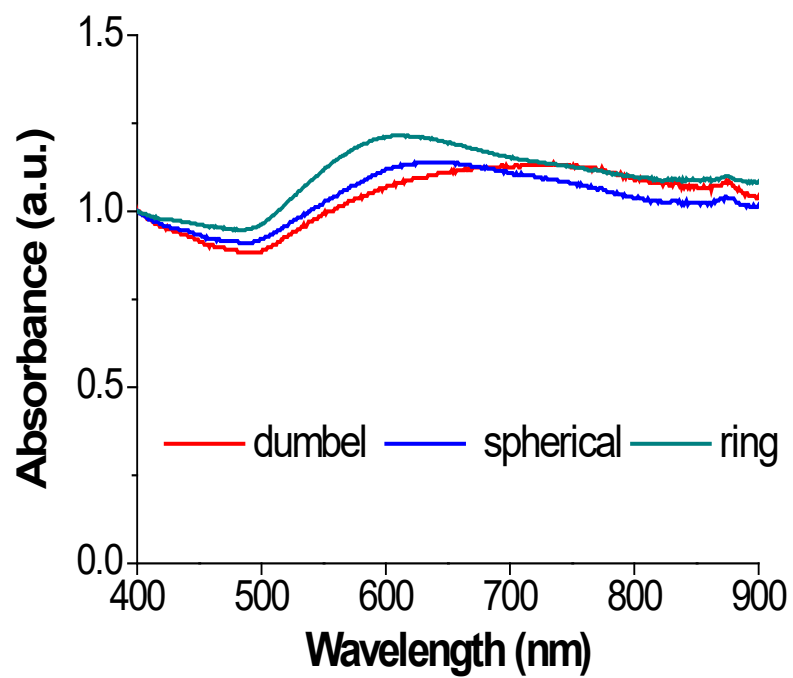

**Fig. S3.** UV-VIS spectrum of various geometries of RNAi-AuNPs with PEI polymer.

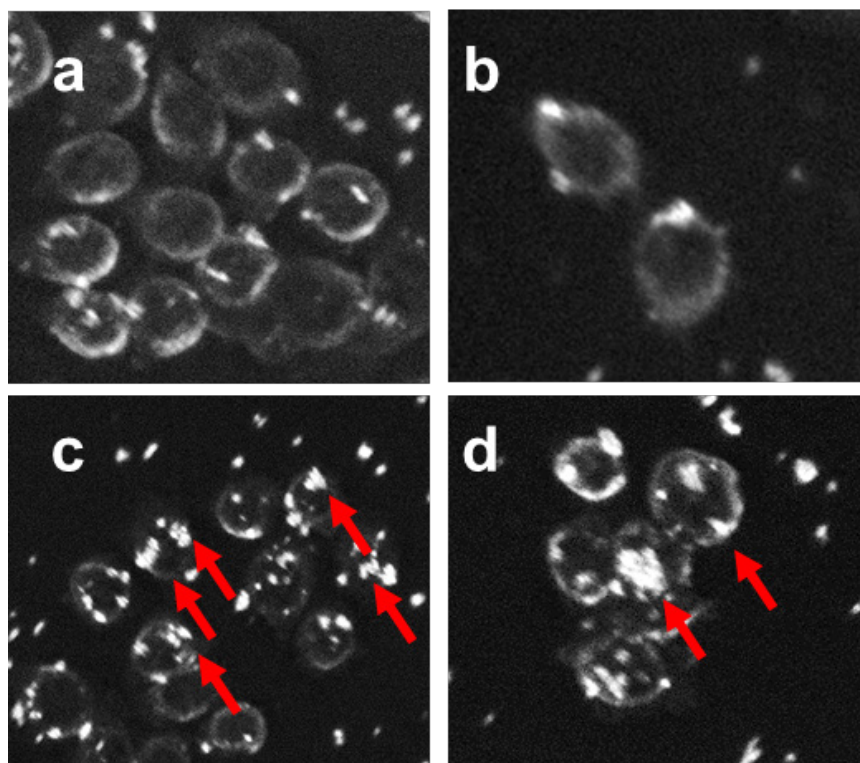

**Fig. S4.** Dark field images of PC cells with bioreducible PEI/RNAi-AuNPs (a,b) and non-reducible PEI/RNAi-AuNPs (c,d) at N/P ratio of 30 after 6 h incubation.

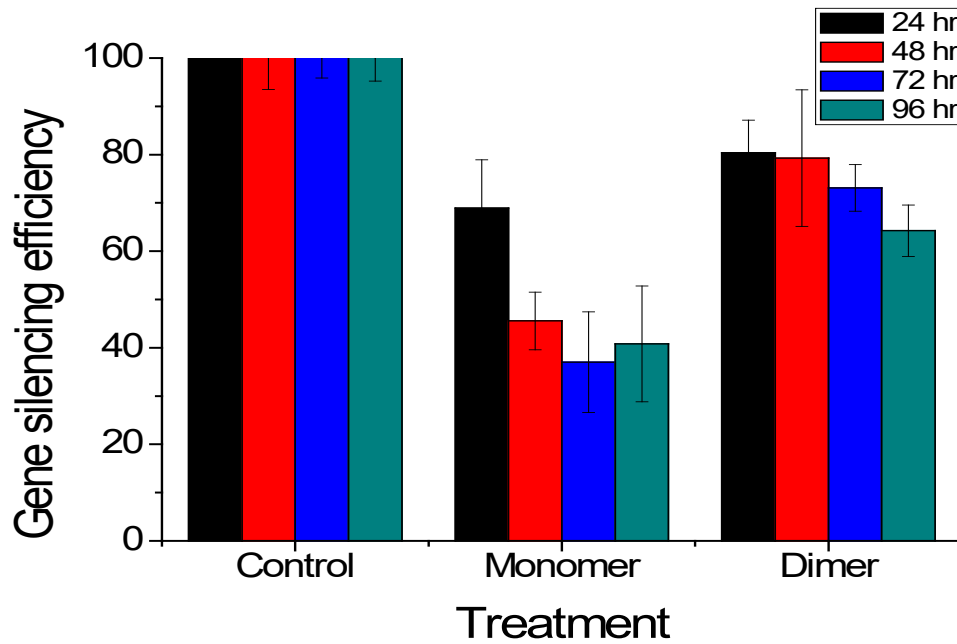

**Fig. S5.** Time dependent VEGF gene silencing efficacy of monomeric and dimeric siVEGF with PEI formulations. All formulations were formed at N/P ratio of 30.

**a**

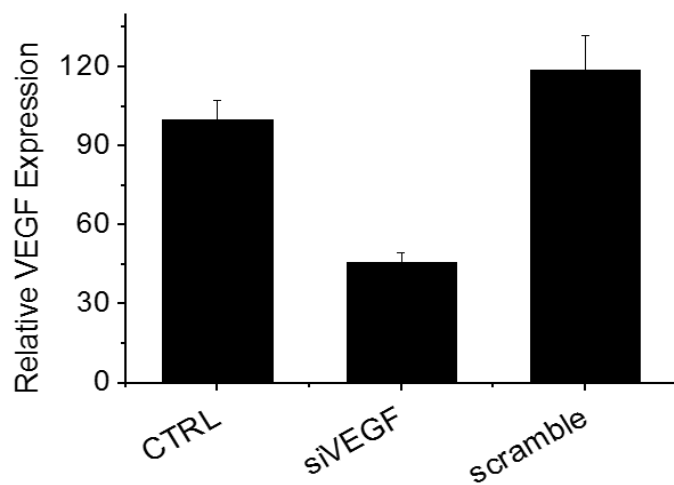

**b**

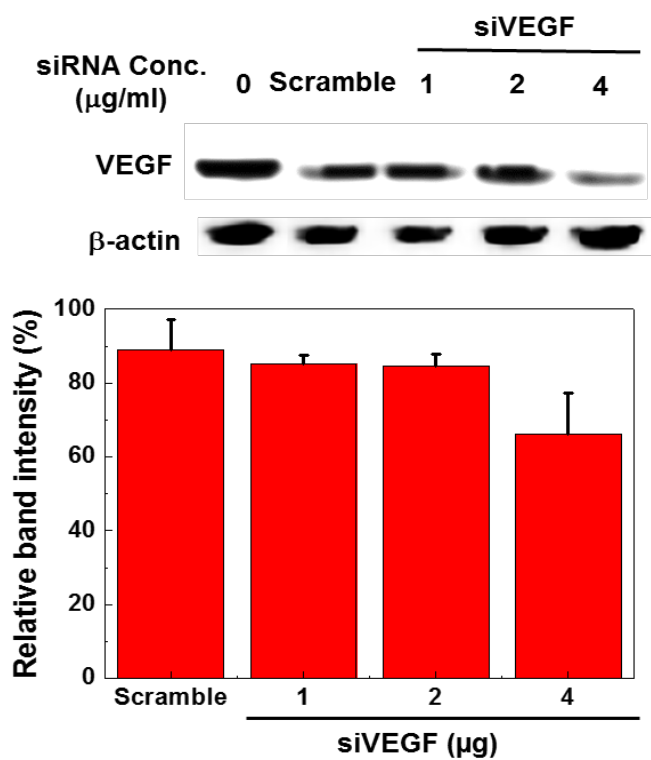

**Fig. S6.** In vitro siVEGF gene silencing efficacy by measuring VEGF protein level (left) and western blotting analysis (right) after 48 h transfection with varying formulations in comparison with scrambled siRNA-AuNP.

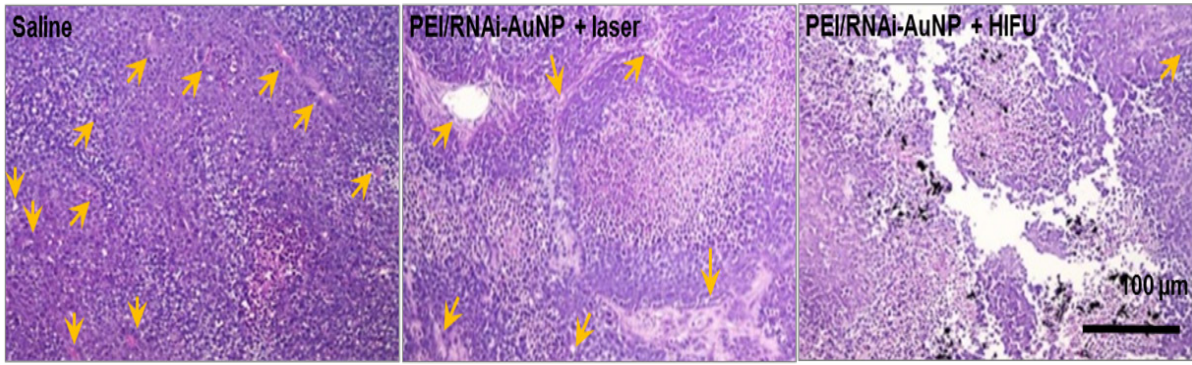

**Fig. S7.** Histological examination (H&E staining) of therapeutic efficacy by anti-VEGF and photothermal combination therapy. Yellow arrows are indicative of blood vessels in tumor tissue.
